# Supplementary material
Source: ML conference proceedings conference paper supplement (https://proceedings.neurips.cc/paper_files/paper/2019/hash/bc6dc48b743dc5d013b1abaebd2faed2-Abstract.html)
Supplement: Supplementary file [file bc6dc48b743dc5d013b1abaebd2faed2-Supplemental.zip]

# Supplementary Material: Randomized Subspace Newton Method

## A Key Lemmas

**Lemma 9.** Let  $y \in \mathbb{R}^d$ ,  $c > 0$  and  $\mathbf{H} \in \mathbb{R}^{d \times d}$  be a symmetric positive semi-definite matrix. Let  $g \in \text{Range}(\mathbf{H})$ . The set of solutions to

$$\hat{x} \in \arg \min_{x \in \mathbb{R}^d} \langle g, x - y \rangle + \frac{c}{2} \|x - y\|_{\mathbf{H}}^2, \quad (29)$$

is given by

$$\hat{x} \in \mathbf{H}^\dagger \left( \mathbf{H}y - \frac{1}{c}g \right) + \text{Null}(\mathbf{H}). \quad (30)$$

Two particular solutions in the above set are given by

$$\hat{x} = y - \frac{1}{c}\mathbf{H}^\dagger g, \quad (31)$$

and the least norm solution

$$x^\dagger = \mathbf{H}^\dagger \left( \mathbf{H}y - \frac{1}{c}g \right). \quad (32)$$

The minimum of (29) is

$$\langle g, \hat{x} - y \rangle + \frac{c}{2} \|\hat{x} - y\|_{\mathbf{H}}^2 = -\frac{1}{2c} \|g\|_{\mathbf{H}^\dagger}^2. \quad (33)$$

*Proof.* Taking the derivative in  $x$  and setting to zero gives

$$\frac{1}{c}g + \mathbf{H}(x - y) = 0.$$

The above linear system is guaranteed to have a solution because  $g \in \text{Range}(\mathbf{H})$ . The solution set to this linear system is the set

$$\mathbf{H}^\dagger \left( \mathbf{H}y - \frac{1}{c}g \right) + \text{Null}(\mathbf{H}).$$

The point (31) belong to the above set by noting that  $(\mathbf{I} - \mathbf{H}^\dagger \mathbf{H})y \in \text{Null}(\mathbf{H})$ , which in turn follows by the  $\mathbf{H} = \mathbf{H}\mathbf{H}^\dagger \mathbf{H}$  property of pseudoinverse matrices. Clearly (32) is the least norm solution.

Finally, using any solution (30) we have that

$$\hat{x} - y \in (\mathbf{H}^\dagger \mathbf{H} - \mathbf{I})y - \frac{1}{c}\mathbf{H}^\dagger g + \text{Null}(\mathbf{H}),$$

which when substituted into (29) gives

$$(29) = \underbrace{\langle g, (\mathbf{H}^\dagger \mathbf{H} - \mathbf{I})y - \frac{1}{c}\mathbf{H}^\dagger g \rangle}_{\alpha} + \frac{c}{2} \underbrace{\|(\mathbf{H}^\dagger \mathbf{H} - \mathbf{I})y - \frac{1}{c}\mathbf{H}^\dagger g\|_{\mathbf{H}}^2}_{\beta}. \quad (34)$$

Since  $g \in \text{Range}(\mathbf{H})$  we have that  $g^\top (\mathbf{H}^\dagger \mathbf{H} - \mathbf{I}) = 0$  and thus  $\alpha = -\frac{1}{c} \|g\|_{\mathbf{H}^\dagger}^2$ . Furthermore

$$\begin{aligned} \beta &= \|(\mathbf{H}^\dagger \mathbf{H} - \mathbf{I})y - \frac{1}{c}\mathbf{H}^\dagger g\|_{\mathbf{H}}^2 \\ &= \|(\mathbf{H}^\dagger \mathbf{H} - \mathbf{I})y\|_{\mathbf{H}}^2 - \frac{2}{c} \langle \mathbf{H}(\mathbf{H}^\dagger \mathbf{H} - \mathbf{I})y, \mathbf{H}^\dagger g \rangle + \frac{1}{c^2} \|\mathbf{H}^\dagger g\|_{\mathbf{H}}^2 \\ &= \frac{1}{c^2} \|\mathbf{H}^\dagger g\|_{\mathbf{H}}^2 = \frac{1}{c^2} \langle g, \mathbf{H}^\dagger \mathbf{H} \mathbf{H}^\dagger g \rangle = \frac{1}{c^2} \|g\|_{\mathbf{H}^\dagger}^2, \end{aligned}$$

where we used that  $\mathbf{H}^\dagger \mathbf{H} \mathbf{H}^\dagger = \mathbf{H}^\dagger$ . Using the above calculations in (34) gives

$$(29) = -\frac{1}{c} \|g\|_{\mathbf{H}^\dagger}^2 + \frac{1}{2c} \|g\|_{\mathbf{H}^\dagger}^2 = -\frac{1}{2c} \|g\|_{\mathbf{H}^\dagger}^2.$$

□

**Lemma 10.** For any matrix  $\mathbf{W}$  and symmetric positive semidefinite matrix  $\mathbf{G}$  such that

$$\text{Null}(\mathbf{G}) \subset \text{Null}(\mathbf{W}^\top), \quad (35)$$

we have that

$$\text{Null}(\mathbf{W}) = \text{Null}(\mathbf{W}^\top \mathbf{G} \mathbf{W}) \quad (36)$$

and

$$\text{Range}(\mathbf{W}^\top) = \text{Range}(\mathbf{W}^\top \mathbf{G} \mathbf{W}). \quad (37)$$

*Proof.* In order to establish (36), it suffices to show the inclusion  $\text{Null}(\mathbf{W}) \supseteq \text{Null}(\mathbf{W}^\top \mathbf{G} \mathbf{W})$  since the reverse inclusion trivially holds. Letting  $s \in \text{Null}(\mathbf{W}^\top \mathbf{G} \mathbf{W})$ , we see that  $\|\mathbf{G}^{1/2} \mathbf{W} s\|^2 = 0$ , which implies  $\mathbf{G}^{1/2} \mathbf{W} s = 0$ . Consequently

$$\mathbf{W} s \in \text{Null}(\mathbf{G}^{1/2}) = \text{Null}(\mathbf{G}) \stackrel{(35)}{\subset} \text{Null}(\mathbf{W}^\top).$$

Thus  $\mathbf{W} s \in \text{Null}(\mathbf{W}^\top) \cap \text{Range}(\mathbf{W})$  which are orthogonal complements which shows that  $\mathbf{W} s = 0$ .

Finally, (37) follows from (36) by taking orthogonal complements. Indeed,  $\text{Range}(\mathbf{W}^\top)$  is the orthogonal complement of  $\text{Null}(\mathbf{W})$  and  $\text{Range}(\mathbf{W}^\top \mathbf{G} \mathbf{W})$  is the orthogonal complement of  $\text{Null}(\mathbf{W}^\top \mathbf{G} \mathbf{W})$ .  $\square$

Our assumptions are inspired on the  $c$ -stability assumption in [18]:

**Proposition 2** ([18]  $c$ -stable). *We say that  $f$  is  $c$ -stable if for every  $y, z \in \mathcal{Q}$ ,  $z \neq y$  we have that  $\|z - y\|_{\mathbf{H}(y)}^2 > 0$ , and there exists a constant  $c \geq 1$  such that*

$$c = \max_{y, z \in \mathcal{Q}} \frac{\|z - y\|_{\mathbf{H}(z)}^2}{\|z - y\|_{\mathbf{H}(y)}^2}. \quad (38)$$

We say that  $f$  is  $L$ -smooth if

$$f(x) \leq f(y) + \langle g(y), x - y \rangle + \frac{L}{2} \|x - y\|_2^2, \quad (39)$$

and  $\mu$ -strongly convex if

$$f(x) \geq f(y) + \langle g(y), x - y \rangle + \frac{\mu}{2} \|x - y\|_2^2. \quad (40)$$

If  $f$  is  $\mu$ -strongly convex and  $L$ -smooth, then  $f$  is  $L/\mu$ -stable. Furthermore if  $f$  is  $c$ -stable then Assumption 1 holds with  $\hat{L} \leq c$  and  $\hat{\mu} \geq \frac{1}{c}$ .

*Proof.* Lemma 2 in [18] proves that  $c$ -stability implies  $c$  relative smoothness and  $c$  relative convexity. The inequalities  $\hat{L} \leq c$  and  $\hat{\mu} \geq \frac{1}{c}$  follow from (38) compared to (22) and (21).  $\square$

## B Proof of Lemma 2

*Proof.* Lemma 1 implies that  $x_{k+1} \in \mathcal{Q}$ , and Lemma 9 in the appendix shows that (5) is a global minimizer for  $\gamma = 1/\hat{L}$ .  $\square$

## C Proof of Lemma 3

*Proof.* Due to (10) we have that

$$f(x_{k+1}) \stackrel{(3)}{\leq} T(x_k, x_{k+1}) = \min_{\lambda \in \mathbb{R}^s} T(x_k, x_k + \lambda \mathbf{S}_k) \leq T(x_k, x_k) = f(x_k).$$

$\square$

## D Proof of Lemma 5

*Proof.* 1. Plugging in  $y = x_k$  and  $x = x_k + \mathbf{S}_k \lambda$  into (3) we have that

$$\begin{aligned} T(x_k + \mathbf{S}_k \lambda, x_k) &= f(x_k) + \langle g(x_k), \mathbf{S}_k \lambda \rangle + \frac{\hat{L}}{2} \|\mathbf{S}_k \lambda\|_{\mathbf{H}(y)}^2 \\ &= f(x_k) + \langle \mathbf{S}_k^\top g(x_k), \lambda \rangle + \frac{\hat{L}}{2} \|\lambda\|_{\mathbf{S}_k^\top \mathbf{H}(x_k) \mathbf{S}_k}^2. \end{aligned} \quad (41)$$

By taking the orthogonal components in (6) we have that  $\mathbf{S}_k^\top g(x_k) \in \text{Range}(\mathbf{S}_k^\top \mathbf{H}(x_k) \mathbf{S}_k)$ , and consequently from Lemma 9 we have that the minimizer is given by

$$\lambda_k \in -\frac{1}{\hat{L}} (\mathbf{S}_k^\top \mathbf{H}(x_k) \mathbf{S}_k)^\dagger \mathbf{S}_k^\top g(x_k) + \text{Null}(\mathbf{S}_k^\top \mathbf{H}(x_k) \mathbf{S}_k). \quad (42)$$

Left multiplying by  $\mathbf{S}_k^\top$  gives

$$\begin{aligned} \mathbf{S}_k^\top \lambda_k &= -\frac{1}{\hat{L}} \mathbf{S}_k^\top (\mathbf{S}_k^\top \mathbf{H}(x_k) \mathbf{S}_k)^\dagger \mathbf{S}_k^\top g(x_k) + \mathbf{S}_k^\top \text{Null}(\mathbf{S}_k^\top \mathbf{H}(x_k) \mathbf{S}_k) \\ &\stackrel{(6)}{=} -\frac{1}{\hat{L}} \mathbf{S}_k^\top (\mathbf{S}_k^\top \mathbf{H}(x_k) \mathbf{S}_k)^\dagger \mathbf{S}_k^\top g(x_k) \\ &\stackrel{\text{Lemma 4}}{=} \frac{1}{\hat{L}} \mathbf{P}_k n(x_k). \end{aligned} \quad (43)$$

Consequently  $x_k + \mathbf{S}_k \lambda_k = x_k + \frac{1}{\hat{L}} \mathbf{P}_k n(x_k)$ .

Furthermore, since  $\lambda_k$  is the minimizer of (41), we have from Lemma 9 and (33) that

$$\begin{aligned} T(x_{k+1}, x_k) &= T(x_k + \mathbf{S}_k \lambda_k) = f(x_k) - \frac{1}{2\hat{L}} \|\mathbf{S}_k^\top g(x_k)\|_{(\mathbf{S}_k^\top \mathbf{H}(x_k) \mathbf{S}_k)^\dagger}^2 \\ &= f(x_k) - \frac{1}{2\hat{L}} \|g(x_k)\|_{\mathbf{S}_k (\mathbf{S}_k^\top \mathbf{H}(x_k) \mathbf{S}_k)^\dagger \mathbf{S}_k^\top}^2. \end{aligned}$$

2. Plugging in the constraint into the objective in (12) gives

$$\begin{aligned} \left\| \mathbf{S}_k \lambda + \frac{1}{\hat{L}} n(x_k) \right\|_{\mathbf{H}(x_k)}^2 &= \|\lambda\|_{\mathbf{S}_k^\top \mathbf{H}(x_k) \mathbf{S}_k}^2 + \frac{2}{\hat{L}} \langle \mathbf{S}_k^\top \mathbf{H}(x_k) n(x_k), \lambda \rangle + \frac{1}{\hat{L}^2} \|n(x_k)\|_{\mathbf{H}(x_k)}^2 \\ &\stackrel{(9)}{=} \|\lambda\|_{\mathbf{S}_k^\top \mathbf{H}(x_k) \mathbf{S}_k}^2 + \frac{2}{\hat{L}} \langle \mathbf{S}_k^\top g(x_k), \lambda \rangle + \frac{1}{\hat{L}^2} \|n(x_k)\|_{\mathbf{H}(x_k)}^2. \end{aligned}$$

Consequently minimizing the above is equivalent to minimizing (41), and thus  $\mathbf{S}_k \lambda$  is given by (43).

3. The Lagrangian of (13) is

$$L(d, \lambda) = \|x - x_k\|_{\mathbf{H}(x_k)}^2 + \left\langle \lambda, \mathbf{S}_k^\top \mathbf{H}(x_k)(x - x_k) + \frac{1}{\hat{L}} \mathbf{S}_k^\top g(x_k) \right\rangle.$$

Differentiating in  $d$  and setting to zero gives

$$\mathbf{H}(x_k)(x - x_k) + \mathbf{H}(x_k) \mathbf{S}_k \lambda = 0. \quad (44)$$

Left multiplying by  $\mathbf{S}_k^\top$  and using the constraint in (13) gives

$$\mathbf{S}_k^\top \mathbf{H}(x_k) \mathbf{S}_k \lambda = \frac{1}{\hat{L}} \mathbf{S}_k^\top g(x_k). \quad (45)$$

Again we have that  $\mathbf{S}_k^\top g(x_k) \in \text{Range}(\mathbf{S}_k^\top \mathbf{H}(x_k) \mathbf{S}_k)$  by (6). Consequently by Lemma 9 we have that the solution set in  $\lambda$  is given by

$$\lambda = \frac{1}{\hat{L}} (\mathbf{S}_k^\top \mathbf{H}(x_k) \mathbf{S}_k)^\dagger \mathbf{S}_k^\top g(x_k) + \text{Null}(\mathbf{S}_k^\top \mathbf{H}(x_k) \mathbf{S}_k).$$

Plugging the above into (44) gives

$$\begin{aligned}\mathbf{H}(x_k)(x - x_k) &= -\frac{1}{\hat{L}}\mathbf{H}(x_k)\mathbf{S}_k (\mathbf{S}_k^\top \mathbf{H}(x_k)\mathbf{S}_k)^\dagger \mathbf{S}_k^\top g(x_k) + \mathbf{H}(x_k)\mathbf{S}_k \text{Null}(\mathbf{S}_k^\top \mathbf{H}(x_k)\mathbf{S}_k) \\ &\stackrel{(6)}{=} -\frac{1}{\hat{L}}\mathbf{H}(x_k)\mathbf{S}_k (\mathbf{S}_k^\top \mathbf{H}(x_k)\mathbf{S}_k)^\dagger \mathbf{S}_k^\top g(x_k).\end{aligned}\quad (46)$$

Thus (8) is a solution to the above. If  $\text{Range}(\mathbf{S}_k) \subset \text{Range}(\mathbf{H}_k(x_k))$  then  $\mathbf{H}_k^\dagger(x_k)\mathbf{H}_k(x_k)\mathbf{S}_k = \mathbf{S}_k$  and the least norm solution is given by (8).  $\square$

## E Proof of Theorem 2

*Proof.* Consider the iterates  $x_k$  given by Algorithm 1 and let  $\mathbb{E}_k[\cdot]$  denote the expectation conditioned on  $x_k$ , that is  $\mathbb{E}_k[\cdot] = \mathbb{E}[\cdot | x_k]$ . Setting  $y = x_k$  in (4) and minimizing both sides<sup>7</sup> using (33) in Lemma 9, we obtain the inequality

$$f_* \geq f(x_k) - \frac{1}{2\hat{\mu}} \|g(x_k)\|_{\mathbf{H}^\dagger(x_k)}^2. \quad (47)$$

From (11) and (3) we have that

$$f(x_{k+1}) \leq f(x_k) - \frac{1}{2\hat{L}} \|g(x_k)\|_{\mathbf{S}_k(\mathbf{S}_k^\top \mathbf{H}(x_k)\mathbf{S}_k)^\dagger \mathbf{S}_k}^2. \quad (48)$$

Taking expectation conditioned on  $x_k$  gives

$$\mathbb{E}_k[f(x_{k+1})] \leq f(x_k) - \frac{1}{2\hat{L}} \|g(x_k)\|_{\mathbf{G}(x_k)}^2. \quad (49)$$

Assumption 2 together with  $\text{Range}(\mathbf{H}(x_k)) = \text{Range}(\mathbf{H}^{1/2}(x_k))$  gives that

$$\mathbf{H}^{\dagger/2}(x_k)\mathbf{H}^{1/2}(x_k)g(x_k) = g(x_k), \quad (50)$$

where  $\mathbf{H}^{\dagger/2}(x_k) = (\mathbf{H}^\dagger(x_k))^{1/2}$ . Consequently

$$\|g(x_k)\|_{\mathbf{G}(x_k)}^2 = \|g(x_k)\|_{\mathbf{H}^{\dagger/2}(x_k)\mathbf{H}^{1/2}(x_k)\mathbf{G}(x_k)\mathbf{H}^{1/2}(x_k)\mathbf{H}^{\dagger/2}(x_k)}^2 \geq \rho(x_k) \|g(x_k)\|_{\mathbf{H}^\dagger(x_k)}^2, \quad (51)$$

where we used the definition (14) of  $\rho(x_k)$  together with  $\mathbf{H}^{\dagger/2}(x_k)g(x_k) \in \text{Range}(\mathbf{H}(x_k))$  in the inequality. Using (51) and (47) in (49) gives

$$\mathbb{E}_k[f(x_{k+1})] \leq f(x_k) - \frac{\rho(x_k)}{2\hat{L}} \|g(x_k)\|_{\mathbf{H}^\dagger(x_k)}^2 \quad (52)$$

$$\leq f(x_k) - \frac{\rho(x_k)\hat{\mu}}{\hat{L}}(f(x_k) - f_*). \quad (53)$$

Subtracting  $f_*$  from both sides gives

$$\mathbb{E}_k[f(x_{k+1}) - f_*] \leq \left(1 - \rho(x_k)\frac{\hat{\mu}}{\hat{L}}\right)(f(x_k) - f_*). \quad (54)$$

Finally, since  $x_k \in \mathcal{Q}$  from Lemma 3, we have that  $\rho \leq \rho(x_k)$  and taking total expectation gives the result (15).  $\square$

## F Proof of Theorem 3

*Proof.* From (52) it follows that

$$\begin{aligned}\mathbb{E}\left[\|g(x_k)\|_{\mathbf{H}^\dagger(x_k)}^2\right] &\stackrel{(52)}{\leq} \mathbb{E}\left[\frac{2\hat{L}}{\rho(x_k)}(f(x_k) - \mathbb{E}_k[f(x_{k+1})])\right] \\ &= \frac{2\hat{L}}{\rho(x_k)}\mathbb{E}[f(x_k) - f(x_{k+1})] \\ &\stackrel{(14)}{\leq} \frac{2\hat{L}}{\rho}\mathbb{E}[f(x_k) - f(x_{k+1})].\end{aligned}\quad (55)$$

<sup>7</sup>Note that  $x^* \in \mathcal{Q}$  but the global minimizer of (33) is not necessarily in  $\mathcal{Q}$ . This is not an issue, since the global minima is a lower bound on the minima constrained to  $\mathcal{Q}$ .

From (48) we have that

$$f(x_{k+1}) \leq f(x_k), \quad (56)$$

and thus

$$x_k \in \mathcal{Q} \quad \text{for all } k = 0, 1, 2, \dots \quad (57)$$

Using the convexity of  $f(x)$ , for every  $x_* \in \mathcal{X}_* := \arg \min f$  we get

$$\begin{aligned} f_* &\geq f(x_k) + \langle g(x_k), x_* - x_k \rangle \\ &\stackrel{(50)}{=} f(x_k) + \left\langle \mathbf{H}^{1/2}(x_k) \mathbf{H}^{\dagger/2}(x_k) g(x_k), x_* - x_k \right\rangle \\ &\geq f(x_k) - \|g(x_k)\|_{\mathbf{H}^{\dagger}(x_k)} \|x_k - x_*\|_{\mathbf{H}(x_k)} \\ &\stackrel{(57)}{\geq} f(x_k) - \|g(x_k)\|_{\mathbf{H}^{\dagger}(x_k)} \sup_{x \in \mathcal{Q}} \|x - x_*\|_{\mathbf{H}(x)}, \end{aligned}$$

hence

$$f(x_k) - f_* \leq \|g(x_k)\|_{\mathbf{H}^{\dagger}(x_k)} \sup_{x \in \mathcal{Q}} \|x - x_*\|_{\mathbf{H}(x)}.$$

Taking infimum among all  $x^* \in \mathcal{X}_*$  and using (17) we get

$$f(x_k) - f_* \leq \mathcal{R} \|g(x_k)\|_{\mathbf{H}^{\dagger}(x_k)}. \quad (58)$$

Hence by Jensen's inequality

$$\begin{aligned} (\mathbb{E}[f(x_k)] - f_*)^2 &\leq \mathbb{E}[(f(x_k) - f_*)^2] \\ &\stackrel{(58)}{\leq} \mathbb{E}[\mathcal{R}^2 \|g(x_k)\|_{\mathbf{H}^{\dagger}(x_k)}^2] \\ &\stackrel{(55)}{\leq} \frac{2\hat{L}\mathcal{R}^2}{\rho} \mathbb{E}[f(x_k) - f(x_{k+1})]. \end{aligned} \quad (59)$$

Now we put everything together:

$$\begin{aligned} \frac{1}{\mathbb{E}[f(x_{k+1}) - f_*]} - \frac{1}{\mathbb{E}[f(x_k) - f_*]} &= \frac{\mathbb{E}[f(x_k) - f(x_{k+1})]}{\mathbb{E}[f(x_{k+1}) - f_*] \mathbb{E}[f(x_k) - f_*]} \\ &\stackrel{(56)}{\geq} \frac{\mathbb{E}[f(x_k) - f(x_{k+1})]}{(\mathbb{E}[f(x_k) - f_*])^2} \\ &\stackrel{(59)}{\geq} \frac{\rho}{2\hat{L}\mathcal{R}^2}. \end{aligned} \quad (60)$$

Summing up (60) for  $k = 0, \dots, T-1$  and using telescopic cancellation we get

$$\frac{\rho T}{2\hat{L}\mathcal{R}^2} \leq \frac{1}{\mathbb{E}[f(x_T) - f_*]} - \frac{1}{\mathbb{E}[f(x_0) - f_*]} \leq \frac{1}{\mathbb{E}[f(x_T) - f_*]}, \quad (61)$$

which after re-arranging concludes the proof.  $\square$

## G Proof of Lemma 6

*Proof.* If (19) holds then by taking orthogonal complements we have that

$$\text{Range}(\mathbf{H}(x_k)) = \text{Null}(\mathbf{H}(x_k))^\perp = \text{Null}(\mathbb{E}[\hat{\mathbf{P}}(x_k)])^\perp, \quad (62)$$

and consequently

$$\begin{aligned} \rho(x_k) &\stackrel{(14)+(62)}{=} \min_{v \in \text{Null}(\mathbb{E}[\hat{\mathbf{P}}(x_k)])^\perp} \frac{\langle \mathbf{H}^{1/2}(x_k) \mathbf{G}(x_k) \mathbf{H}^{1/2}(x_k) v, v \rangle}{\|v\|_2^2} \\ &= \min_{v \in \text{Null}(\mathbb{E}[\hat{\mathbf{P}}(x_k)])^\perp} \frac{\langle \mathbb{E}[\hat{\mathbf{P}}(x_k)] v, v \rangle}{\|v\|_2^2} = \lambda_{\min}^+(\mathbb{E}[\hat{\mathbf{P}}(x_k)]) > 0. \end{aligned}$$

$\square$

## H Proof of Lemma 7

*Proof.* Let  $\mathcal{X}_{\mathbf{S}}$  be a random subset of  $\mathbb{R}^d$ , where  $\mathbf{S} \sim \mathcal{D}$ . We define stochastic intersection of  $\mathcal{X}_{\mathbf{S}}$ :

$$\bigcap_{\mathbf{S} \sim \mathcal{D}} \mathcal{X}_{\mathbf{S}} = \{x \in \mathbb{R}^d : x \in \mathcal{X}_{\mathbf{S}} \text{ with probability } 1\}. \quad (63)$$

Using this definition for  $\text{Null}(\mathbf{G}_k)$  we have

$$\begin{aligned} \text{Null}(\mathbf{G}_k) &= \text{Null}\left(\mathbb{E}_{\mathbf{S} \sim \mathcal{D}} \left[\mathbf{S} (\mathbf{S}^\top \mathbf{H}(x_k) \mathbf{S})^\dagger \mathbf{S}^\top\right]\right) \\ &= \bigcap_{\mathbf{S} \sim \mathcal{D}} \text{Null}\left(\mathbf{S} (\mathbf{S}^\top \mathbf{H}(x_k) \mathbf{S})^\dagger \mathbf{S}^\top\right), \end{aligned} \quad (64)$$

where the last equality follows from the fact that  $\mathbf{S} (\mathbf{S}^\top \mathbf{H}(x_k) \mathbf{S})^\dagger \mathbf{S}^\top$  is a symmetric positive semidefinite matrix. From the properties of pseudoinverse it follows that

$$\text{Null}\left((\mathbf{S}^\top \mathbf{H}(x_k) \mathbf{S})^\dagger\right) = \text{Null}(\mathbf{S}^\top \mathbf{H}(x_k) \mathbf{S}) = \text{Null}(\mathbf{S}),$$

thus, we can apply Lemma 10 and obtain

$$\text{Null}\left(\mathbf{S} (\mathbf{S}^\top \mathbf{H}(x_k) \mathbf{S})^\dagger \mathbf{S}^\top\right) = \text{Null}(\mathbf{S}^\top). \quad (65)$$

Furthermore,

$$\begin{aligned} \text{Null}(\mathbf{G}_k) &\stackrel{(64)}{=} \bigcap_{\mathbf{S} \sim \mathcal{D}} \text{Null}\left(\mathbf{S} (\mathbf{S}^\top \mathbf{H}(x_k) \mathbf{S})^\dagger \mathbf{S}^\top\right) \\ &\stackrel{(65)}{=} \bigcap_{\mathbf{S} \sim \mathcal{D}} \text{Null}(\mathbf{S}^\top) \\ &= \bigcap_{\mathbf{S} \sim \mathcal{D}} \text{Null}(\mathbf{S} \mathbf{S}^\top) \\ &= \text{Null}(\mathbb{E}_{\mathbf{S} \sim \mathcal{D}} [\mathbf{S} \mathbf{S}^\top]). \end{aligned} \quad (66)$$

From (20) and (66) it follows that

$$\text{Null}(\mathbf{G}_k) \subset \text{Null}(\mathbf{H}(x_k)) = \text{Null}(\mathbf{H}^{1/2}(x_k)), \quad (67)$$

hence, Lemma 10 implies that

$$\text{Range}(\mathbf{H}(x_k)) = \text{Range}(\mathbf{H}^{1/2}(x_k) \mathbf{G}_k \mathbf{H}^{1/2}(x_k)), \quad (68)$$

which concludes the proof.  $\square$

## I Proof of Lemma 8

*Proof.* Using Taylor's theorem, for every  $x, y \in \mathcal{Q}$  we have that

$$f(x) = f(y) + \langle g(y), x - y \rangle + \int_{t=0}^1 (1-t) \|x - y\|_{\mathbf{H}(y+t(x-y))}^2 dt. \quad (69)$$

Comparing the above with (3) we have that

$$\frac{\hat{L}}{2} \|x - y\|_{\mathbf{H}(y)}^2 \geq \int_{t=0}^1 (1-t) \|x - y\|_{\mathbf{H}(y+t(x-y))}^2 dt, \quad \forall x, y \in \mathcal{Q}, x \neq y. \quad (70)$$

Let  $x \neq y$ . Since we assume that  $\|x - y\|_{\mathbf{H}(y)}^2 \neq 0$  we have that the relative smoothness constant satisfies

$$\frac{\hat{L}}{2} = \max_{x, y \in \mathcal{Q}} \int_{t=0}^1 \frac{(1-t) \|x - y\|_{\mathbf{H}(y+t(x-y))}^2}{\|x - y\|_{\mathbf{H}(y)}^2} dt. \quad (71)$$

Let  $z_t = y + t(x - y)$ . Substituting  $x - y = (z_t - y)/t$  in the above gives the equality in (21). Following an analogous argument for the relative convexity constant  $\hat{\mu}$  gives the equality in (21).

Since  $f(x)$  is convex, the set  $\mathcal{Q}$  is convex and thus  $z_t \in \mathcal{Q}$  for all  $t \in [0, 1]$ . By alternating the order of the maximization and integral in (21) that

$$\begin{aligned} \frac{\hat{L}}{2} &\stackrel{(21)}{\leq} \int_{t=0}^1 (1-t) \max_{x,y \in \mathcal{Q}} \frac{\|z_t - y\|_{\mathbf{H}(z_t)}^2}{\|z_t - y\|_{\mathbf{H}(y)}^2} dt \\ &\stackrel{z_t \in \mathcal{Q}}{\leq} \int_{t=0}^1 (1-t) dt \max_{x,y \in \mathcal{Q}} \frac{\|x - y\|_{\mathbf{H}(x)}^2}{\|x - y\|_{\mathbf{H}(y)}^2} = \frac{1}{2} \max_{x,y \in \mathcal{Q}} \frac{\|x - y\|_{\mathbf{H}(x)}^2}{\|x - y\|_{\mathbf{H}(y)}^2}. \end{aligned}$$

Following an analogous argument for the relative convexity constant  $\hat{\mu}$  we have that

$$\begin{aligned} \frac{\hat{\mu}}{2} &\stackrel{(22)}{\geq} \int_{t=0}^1 (1-t) \min_{x,y \in \mathcal{Q}} \frac{\|z_t - y\|_{\mathbf{H}(z_t)}^2}{\|z_t - y\|_{\mathbf{H}(y)}^2} dt \\ &\stackrel{z_t \in \mathcal{Q}}{\geq} \int_{t=0}^1 (1-t) dt \min_{x,y \in \mathcal{Q}} \frac{\|x - y\|_{\mathbf{H}(x)}^2}{\|x - y\|_{\mathbf{H}(y)}^2} = \frac{1}{2} \frac{1}{\max_{x,y \in \mathcal{Q}} \frac{\|x - y\|_{\mathbf{H}(x)}^2}{\|x - y\|_{\mathbf{H}(y)}^2}}. \end{aligned}$$

□

## J Proof of Corollary 1

*Proof.* Using that

$$0 < d_i^\top \mathbf{H}(x) d_i \leq d_i^\top \mathbf{U} d_i, \quad (72)$$

which follows from  $\mathbf{H} \preceq \mathbf{U}$  and our assumption that  $d_i^\top \mathbf{H}(x) d_i \neq 0$ , we have that

$$\begin{aligned} \mathbf{G}(x) &= \mathbb{E}_k [\mathbf{S}(\mathbf{S}^\top \mathbf{H}(x) \mathbf{S})^\dagger \mathbf{S}^\top] = \sum_{i=1}^d \frac{d_i \mathbf{U} d_i}{\text{Trace}(\mathbf{D}^\top \mathbf{U} \mathbf{D})} \frac{d_i d_i^\top}{d_i^\top \mathbf{H}(x) d_i} \\ &\stackrel{(72)}{\preceq} \frac{1}{\text{Trace}(\mathbf{D}^\top \mathbf{U} \mathbf{D})} \sum_{i=1}^d d_i d_i^\top = \frac{1}{\text{Trace}(\mathbf{D}^\top \mathbf{U} \mathbf{D})} \mathbf{D} \mathbf{D}^\top. \end{aligned} \quad (73)$$

Furthermore since  $\mathbf{D}$  is invertible we have by Lemma 10 that

$$\text{Range}(\mathbf{H}^{1/2}(x) \mathbf{D} \mathbf{D}^\top \mathbf{H}^{1/2}(x)) = \text{Range}(\mathbf{H}^{1/2}(x)) = \text{Range}(\mathbf{H}(x)). \quad (74)$$

And thus from Lemma 6 we have that

$$\rho = \min_{x \in \mathcal{Q}} \lambda_{\min}^+(\hat{\mathbf{P}}(x)) \stackrel{(18)}{\geq} \min_{x \in \mathcal{Q}} \frac{\lambda_{\min}^+(\mathbf{H}^{1/2}(x) \mathbf{D} \mathbf{D}^\top \mathbf{H}^{1/2}(x))}{\text{Trace}(\mathbf{D}^\top \mathbf{U} \mathbf{D})}. \quad (75)$$

□

## K Proof of Proposition 1

*Proof.* The gradient and Hessian of (26) are given by

$$g(x) = \frac{1}{n} \sum_{i=1}^n a_i \phi'_i(a_i^\top x) + \lambda x = \frac{1}{n} \mathbf{A} \Phi'(\mathbf{A}^\top x) + \lambda x, \quad (76)$$

$$\mathbf{H}(x) = \frac{1}{n} \sum_{i=1}^n a_i a_i^\top \phi''_i(a_i^\top x) + \lambda \mathbf{I} = \frac{1}{n} \mathbf{A} \Phi''(\mathbf{A}^\top x) \mathbf{A}^\top + \lambda \mathbf{I}, \quad (77)$$

where

$$\Phi'(\mathbf{A}^\top x) := [\phi'_1(a_1^\top x), \dots, \phi'_n(a_n^\top x)] \in \mathbb{R}^n, \quad (78)$$

$$\Phi''(\mathbf{A}^\top x) := \text{diag}(\phi''_1(a_1^\top x), \dots, \phi''_n(a_n^\top x)). \quad (79)$$

Consequently the  $g(x) \in \text{Range}(\mathbf{H}(x))$  for all  $x \in \mathbb{R}^d$ .

Using Lemma 8 and (77) we have that

$$\begin{aligned}
\hat{L} &\leq \max_{y, z \in \mathbb{R}^d} \frac{\|y - z\|_{\frac{1}{n} \mathbf{A} \Phi''(\mathbf{A}^\top y) \mathbf{A}^\top + \lambda \mathbf{I}}^2}{\|y - z\|_{\frac{1}{n} \mathbf{A} \Phi''(\mathbf{A}^\top z) \mathbf{A}^\top + \lambda \mathbf{I}}^2} \\
&\stackrel{(25)}{\leq} \max_{y, z \in \mathbb{R}^d} \frac{\|y - z\|_{\frac{\ell}{n} \mathbf{A} \mathbf{A}^\top + \lambda \mathbf{I}}^2}{\|y - z\|_{\frac{u}{n} \mathbf{A} \mathbf{A}^\top + \lambda \mathbf{I}}^2} \\
&= \max_{y, z \in \mathbb{R}^d} \frac{\|y - z\|_{\frac{\ell-u}{n} \mathbf{A} \mathbf{A}^\top}^2 + \|y - z\|_{\frac{u}{n} \mathbf{A} \mathbf{A}^\top + \lambda \mathbf{I}}^2}{\|y - z\|_{\frac{u}{n} \mathbf{A} \mathbf{A}^\top + \lambda \mathbf{I}}^2} \\
&= 1 + \max_{y, z \in \mathbb{R}^d} \frac{\|y - z\|_{\frac{\ell-u}{n} \mathbf{A} \mathbf{A}^\top}^2}{\|y - z\|_{\frac{u}{n} \mathbf{A} \mathbf{A}^\top + \lambda \mathbf{I}}^2} \tag{80}
\end{aligned}$$

Now note that

$$\begin{aligned}
\max_{y, z \in \mathbb{R}^d} \frac{\|y - z\|_{\frac{\ell-u}{n} \mathbf{A} \mathbf{A}^\top}^2}{\|y - z\|_{\frac{u}{n} \mathbf{A} \mathbf{A}^\top + \lambda \mathbf{I}}^2} &= \frac{1}{\min_{y, z \in \mathbb{R}^d} \frac{\|y - z\|_{\frac{u}{n} \mathbf{A} \mathbf{A}^\top + \lambda \mathbf{I}}^2}{\|y - z\|_{\frac{\ell-u}{n} \mathbf{A} \mathbf{A}^\top}^2}} \\
&= \frac{1}{\frac{u}{\ell-u} + \lambda \min_{y, z \in \mathbb{R}^d} \frac{\|y - z\|_2^2}{\|y - z\|_{\frac{\ell-u}{n} \mathbf{A} \mathbf{A}^\top}^2}} \\
&= \frac{1}{\frac{u}{\ell-u} + \frac{n\lambda}{\ell-u} \frac{1}{\sigma_{\max}^2(\mathbf{A})}}, \tag{81}
\end{aligned}$$

where we used that

$$\min_{y, z \in \mathbb{R}^d} \frac{\|y - z\|_2^2}{\|y - z\|_{\mathbf{A} \mathbf{A}^\top}^2} = \frac{1}{\max_{y, z \in \mathbb{R}^d} \frac{\|y - z\|_{\mathbf{A} \mathbf{A}^\top}^2}{\|y - z\|_2^2}} = \frac{1}{\sigma_{\max}^2(\mathbf{A})}. \tag{82}$$

Inserting (81) into (80) gives

$$\hat{L} \leq 1 + \frac{\ell - u}{u + \frac{n\lambda}{\sigma_{\max}^2(\mathbf{A})}} = \frac{\ell \sigma_{\max}^2(\mathbf{A}) + n\lambda}{u \sigma_{\max}^2(\mathbf{A}) + n\lambda}.$$

The bounds for  $\hat{\mu}$  follows from (22).

Finally turning to Lemma 7 we have that (6) holds since  $\mathbf{H}(x_k)$  is positive definite and by Lemma 10, and (20) holds by our assumption that  $\mathbb{E}[\mathbf{S}\mathbf{S}^\top]$  is invertible. Thus by Lemma 7 we have that  $\rho > 0$  and the total complexity result in Theorem 2 holds.  $\square$

## L Uniform single coordinate sketch

Further to our results on using single column sketches with non-uniform sampling in Corollary 1, here we present the case for uniform sampling that does not rely on the Hessian having a uniform upper bound as is assumed in Corollary 1. Let  $\mathbf{H}_{ii}(x) := e_i^\top \mathbf{H}(x) e_i$  and  $g_i(x) := e_i^\top g(x)$ . In this case (8) is given by

$$x_{k+1} = x_k - \frac{g_i(x_k)}{\hat{L} \mathbf{H}_{ii}(x_k)} e_i. \tag{83}$$



---

**Algorithm 2** RSNxls: Randomized Subspace Newton with exact Line-Search

---

```

1: input:  $x_0 \in \mathbb{R}^d$ 
2: parameters:  $\mathcal{D}$  = distribution over random matrices
3: for  $k = 0, 1, 2, \dots$  do
4:    $\mathbf{S}_k \sim \mathcal{D}$ 
5:    $\lambda_k = -(\mathbf{S}_k^\top \mathbf{H}(x_k) \mathbf{S}_k)^\dagger \mathbf{S}_k^\top g(x_k)$ 
6:    $d_k = \mathbf{S}_k \lambda_k$ 
7:    $t_k = \operatorname{argmin}_{t \in \mathbb{R}} f(x_k + t d_k)$ 
8:    $x_{k+1} = x_k + t_k d_k$ 
9: output: last iterate  $x_k$ 

```

---

**Corollary 2.** Let  $\mathbb{P}[\mathbf{S}_k = e_i] = \frac{1}{d}$  and let

$$\alpha = \min_{x \in \mathbb{R}^d} \min_{w \in \operatorname{Range}(\mathbf{H}(x))} \frac{\|w\|_{\mathbf{Diag}(\mathbf{H}(x))^{-1}}^2}{\|w\|_{\mathbf{H}^\dagger(x)}^2}.$$

Under the assumptions of Theorem 2 we have that Algorithm 1 converges according to

$$\mathbb{E}[f(x_k) - f_*] \leq \left(1 - \frac{\alpha \hat{\mu}}{d \hat{L}}\right)^k (f(x_0) - f_*).$$

*Proof.* It follows by direct computation that

$$\mathbf{G}(x) = \mathbb{E}_k [\mathbf{S}(\mathbf{S}^\top \mathbf{H}(x) \mathbf{S})^\dagger \mathbf{S}^\top] = \frac{1}{d} \sum_{i=1}^d \frac{e_i e_i^\top}{\mathbf{H}_{ii}(x)} = \frac{1}{d} \mathbf{Diag}(\mathbf{H}(x))^{-1}.$$

Thus from the definition (14) we have

$$\rho = \frac{1}{d} \min_{x \in \mathbb{R}^d} \min_{v \in \operatorname{Range}(\mathbf{H}(x))} \frac{\langle \mathbf{H}^{1/2}(x) \mathbf{Diag}(\mathbf{H}(x))^{-1} \mathbf{H}^{1/2}(x) v, v \rangle}{\|v\|_2^2}.$$

Since  $\operatorname{Range}(\mathbf{H}^{\dagger/2}(x)) = \operatorname{Range}(\mathbf{H}(x))$  and  $v \in \operatorname{Range}(\mathbf{H}(x))$  we can re-write  $v = \mathbf{H}^{\dagger/2}(x)w$  where  $w \in \operatorname{Range}(\mathbf{H}(x))$  and consequently

$$\begin{aligned} \rho &= \frac{1}{d} \min_{x \in \mathbb{R}^d} \min_{w \in \operatorname{Range}(\mathbf{H}(x))} \frac{\langle \mathbf{Diag}(\mathbf{H}(x))^{-1} \mathbf{H}^{1/2}(x) \mathbf{H}^{\dagger/2}(x) w, \mathbf{H}^{1/2}(x) \mathbf{H}^{\dagger/2}(x) w \rangle}{\|w\|_{\mathbf{H}^\dagger(x)}^2} \\ &\stackrel{\mathbf{H}^{1/2}(x) \mathbf{H}^{\dagger/2}(x) w = w}{=} \frac{1}{d} \min_{x \in \mathbb{R}^d} \min_{w \in \operatorname{Range}(\mathbf{H}(x))} \frac{\langle \mathbf{Diag}(\mathbf{H}(x))^{-1} w, w \rangle}{\langle \mathbf{H}(x) w, w \rangle_2} := \frac{\alpha}{d}. \end{aligned}$$

□

## M Experimental details

All tests were performed in MATLAB 2018b on a PC with an Intel quad-core i7-4770 CPU and 32 Gigabyte of DDR3 RAM running Ubuntu 18.04.

### M.1 Sketched Line-Search

In order to speed up convergence we can modify Algorithm 1 by introducing an exact Line-Search and obtain Algorithm 2.

In this section we focus on heuristics for performing an exact Line-Search under the assumption that our direction is of the form  $d = \mathbf{S}\lambda$ . This allows us to only work with sketched gradients

---

**Algorithm 3** Generic Line Search - Pseudocode

---

```

1: input: increasing continuous function  $l : \mathbb{R} \rightarrow \mathbb{R}$  with  $l(0) < 0$  and at least one root  $t^* \in \mathbb{R}_+$ 
2: tolerance:  $\epsilon > 0$ 
3: set  $[a, b] \leftarrow [0, 1]$ 
4: while  $l(b) < -\epsilon$ 
5:     choose  $t > b$   $\triangleright$  either fixed enlargement ( $t = 2b$ ) or via spline extrapolation
6:     set  $[a, b] \leftarrow [b, t]$ 
7: endwhile  $\triangleright$  end of first phase: either  $|l(b)| \leq \epsilon$  or  $l(a) < 0 < \epsilon \leq l(b)$ , i.e.  $t^* \in [a, b]$ 
8: set  $t \leftarrow b$ 
9: while  $|l(t)| > \epsilon$ 
10:    if  $l(t) < 0$ 
11:         $[a, b] \leftarrow [t, b]$ 
12:    else  $l(t) > 0$ 
13:         $[a, b] \leftarrow [a, t]$ 
14:    endif
15: choose  $t$  with  $a < t < b$   $\triangleright$  either middle of interval ( $t = \frac{a+b}{2}$ ) or via spline interpolation
16: endwhile  $\triangleright$  end of second phase
17: output:  $t > 0$  with  $|l(t)| \leq \epsilon$ 

```

---

and sketched Hessians. This potentially allows for significant computational savings. Specifically consider the problem of finding

$$t^* := \operatorname{argmin}_{t \in \mathbb{R}} f(x + td), \quad (84)$$

which is, for differentiable and convex  $f$ , equivalent to finding a root of the objectives first derivative. Defining

$$l(t) := \frac{\partial f(x + td)}{\partial t} = d^\top g(x + td) = \lambda^\top (\mathbf{S}^\top g(x + td)) \quad (85)$$

gives us the task of solving

$$l(t^*) = 0 \quad (86)$$

and differentiating once more

$$l'(t) = \frac{\partial^2 f(x + td)}{\partial^2 t} = d^\top \mathbf{H}(x + td)d = \lambda^\top (\mathbf{S}^\top \mathbf{H}(x + td)\mathbf{S})\lambda, \quad (87)$$

reveals that we do not need full, but only sketched gradient and Hessian access, in order to evaluate  $l$  respectively  $l'$ . Note that the evaluation of

$$\begin{aligned} l(0) &= \lambda^\top \mathbf{S}^\top g(x) \\ l'(0) &= \lambda^\top (\mathbf{S}^\top \mathbf{H}(x)\mathbf{S})\lambda \end{aligned} \quad (88)$$

are essentially a by-product from the computation of  $\lambda$  in Algorithm 2 and therefore add almost no computational cost. Furthermore, if  $f$  is convex and  $\lambda = -(\mathbf{S}^\top \mathbf{H}(x)\mathbf{S})^\dagger \mathbf{S}^\top g(x)$  is given, then

$$l(0) = -g(x)^\top \mathbf{S}(\mathbf{S}^\top \mathbf{H}(x)\mathbf{S})^\dagger \mathbf{S}^\top g(x) \leq 0 \quad (89)$$

implies that  $d$  is a weak descent direction of  $f$ . Since in this case,  $l(0) = 0$  implies  $t^* = 0$ , let us focus on the situation that we actually have a strong descent direction, i.e. that

$$l(0) < 0 \quad (90)$$

is satisfied. The line-search 3 ensures an output  $t > 0$  satisfying  $|l(t)| \leq \epsilon$  and is best explained by strengthening Step 4 of (3) to “**while**  $l(b) < 0$ ”, as this would ensure that the final values of  $a$  and  $b$  box the minimum  $t^* \in [a, b]$ : The first phase is to identify an interval  $[a, b]$  with  $0 \leq a < b$  such that

$$l(a) < 0 \leq l(b) \quad (91)$$

which guarantees the existence of at least one minimum  $t^* \in [a, b]$ . In the second phase, we can then decrease the intervals length with  $a \leq \bar{a} < \bar{b} \leq b$  such that  $0 \leq l(t) \leq \epsilon$  is satisfied for all  $t \in [\bar{a}, \bar{b}]$  and some given tolerance  $\epsilon > 0$ . Both steps should be safeguarded and can be assisted by using cubic splines inter- or extrapolating  $l(t)$ . This approach has the potential of reducing computational costs and the benefit of avoiding function evaluations of  $f$  entirely.
